# Supplementary material for: Characteristics and RISM of sliding flow landslides triggered by prolonged heavy rainfall in the loess area of Tianshui, China
Source: Copernicus journal article supplement (doi:10.5194/nhess-2022-135), 2022-05-19
Supplement: Supplementary file [file nhess-2022-135-AC1-supplement.pdf]

Dear Editors and Reviewer:

Thank you for your letter and for the reviewers' comments concerning our manuscript entitled "Characteristics and RISM of sliding flow landslides triggered by prolonged heavy rainfall in the loess area of Tianshui, China" (ID: nness-2022-135). Those comments are all valuable and very helpful for revising and improving our paper, as well as the important guiding significance to our researches. We have studied comments carefully and have made correction which we hope meet with approval. The authors upload the both file ([one is revised with tracking word and the other is revised without tracking word](#)). The main corrections in the paper and the responds to the reviewer's comments are as following:

Responds to the reviewer's comments:

### **Reviewer: 1**

1) the manuscript title is not suitable, and the manuscript title should contain the key words: prediction model etc. e.g., the title can be revised to: A novel prediction method of shallow landslide in loess area based on RISM, a "7.25" loess sliding-flow landslide event in 2013 in Tianshui, China case study.

[Responded: Thank you for the suggestion, Considering the Reviewer's suggestion, the authors have changed the title to A novel prediction method of shallow landslide in loess area based on RISM, a "7.25" loess sliding-flow landslide event in 2013 in Tianshui, China case study.](#)

2) Literatures seems to be extensive. Some recent research on shallow landslides, are suggested to be incorporated and supplemented. For example:

Fatma Keles and Hakan A. Nefeslioglu. Infinite slope stability model and steady-state hydrology-based shallow landslide susceptibility evaluations: The Guneyisu catchment area (Rize, Turkey), CATENA, 2021.

Medina V et al. Fast physically-based model for rainfall-induced landslide susceptibility assessment at regional scale. CATENA, 2021.

[Responded: Thank you for the suggestion, Considering the Reviewer's suggestion, the authors have added the recent research on shallow landslides in the section introduction.](#)

3) the shallow loess landslide event name is not the same, e.g., "7.25 loess landslides" is used in the abstract, and "7.25" loess sliding-flow landslide events is used in text, please make it unified.

[Responded: Thank you for the suggestion, Considering the Reviewer's suggestion, the authors have revised the shallow loess landslide event name through the text.](#)

4) Line 85, In Section Introduction, please focus on scientific issues clearly and work to solve these problems well. This section needs definitely gives the research gap and objective about your work.

Responded: Thank you for the suggestion, Considering the Reviewer's suggestion, the authors have revised introduction and focus on scientific issues clearly and work to solve these problems well.

5) Do the earthquakes and symbols in Figure 1 represent the earthquake magnitude? If so, please add their units "Ms".

Responded: Thank you for the suggestion, Considering the Reviewer's suggestion, the authors have re-drawn the Figure 1.

6) English requires proofread by native speakers.

Responded: Thank you for the suggestion, the authors have polished the manuscript by native English speaker.

Yours sincerely,

Jianqi Zhuang etc.

E-mail: jqzhuang@chd.edu.cn
